# Supplementary material for: The Vigorous Immune Microenvironment of Microsatellite Instable Colon Cancer Is Balanced by Multiple Counter-Inhibitory Checkpoints
Source: Oxford University Press journal article supplement (doi:10.1158/2159-8290.cd-14-0863), 2014-10-31
Supplement: 21598290cd140863-sup-135995_1_supp_0_n19mch.pdf [file 21598290cd140863-sup-135995_1_supp_0_n19mch.pdf]

# Figure S1

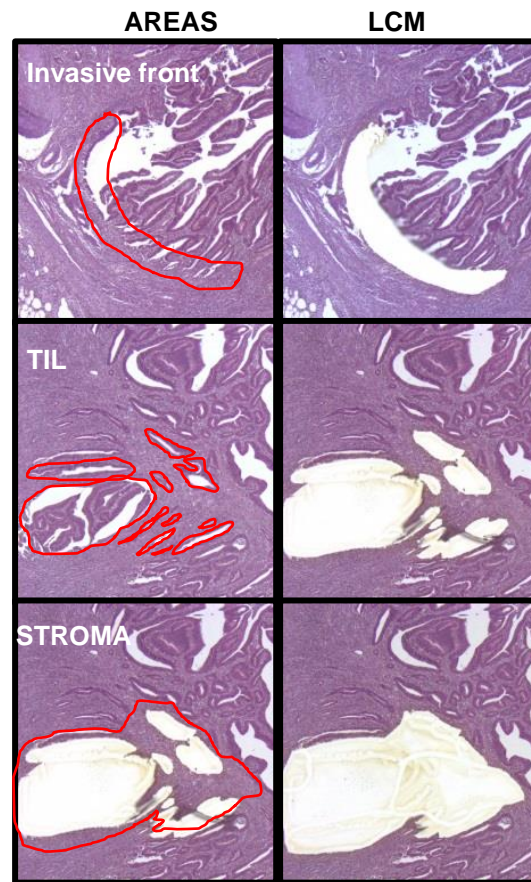

**Fig. S1. Laser capture microdissection of FFPE tissue sections.** LCM was used to collect tissues from invasive front (top), TIL (center), and tumor stroma (bottom) areas. The figure shows the different regions before and after LCM was performed on H&E stained tissue section.
